# Supplementary material for: Phosphorylation of ULK1 by AMPK is essential for mouse embryonic stem cell self-renewal and pluripotency
Source: PubMed Central journal article supplement (PMC5833692; doi:10.1038/s41419-017-0054-z), 2018-01-18
Supplement: 41419_2017_54_MOESM1_ESM.pdf [file 41419_2017_54_MOESM1_ESM.pdf]

# Supplementary Figure 1. Ulk1 but not Ulk2 silence impaired ESC self-renewal and pluripotency

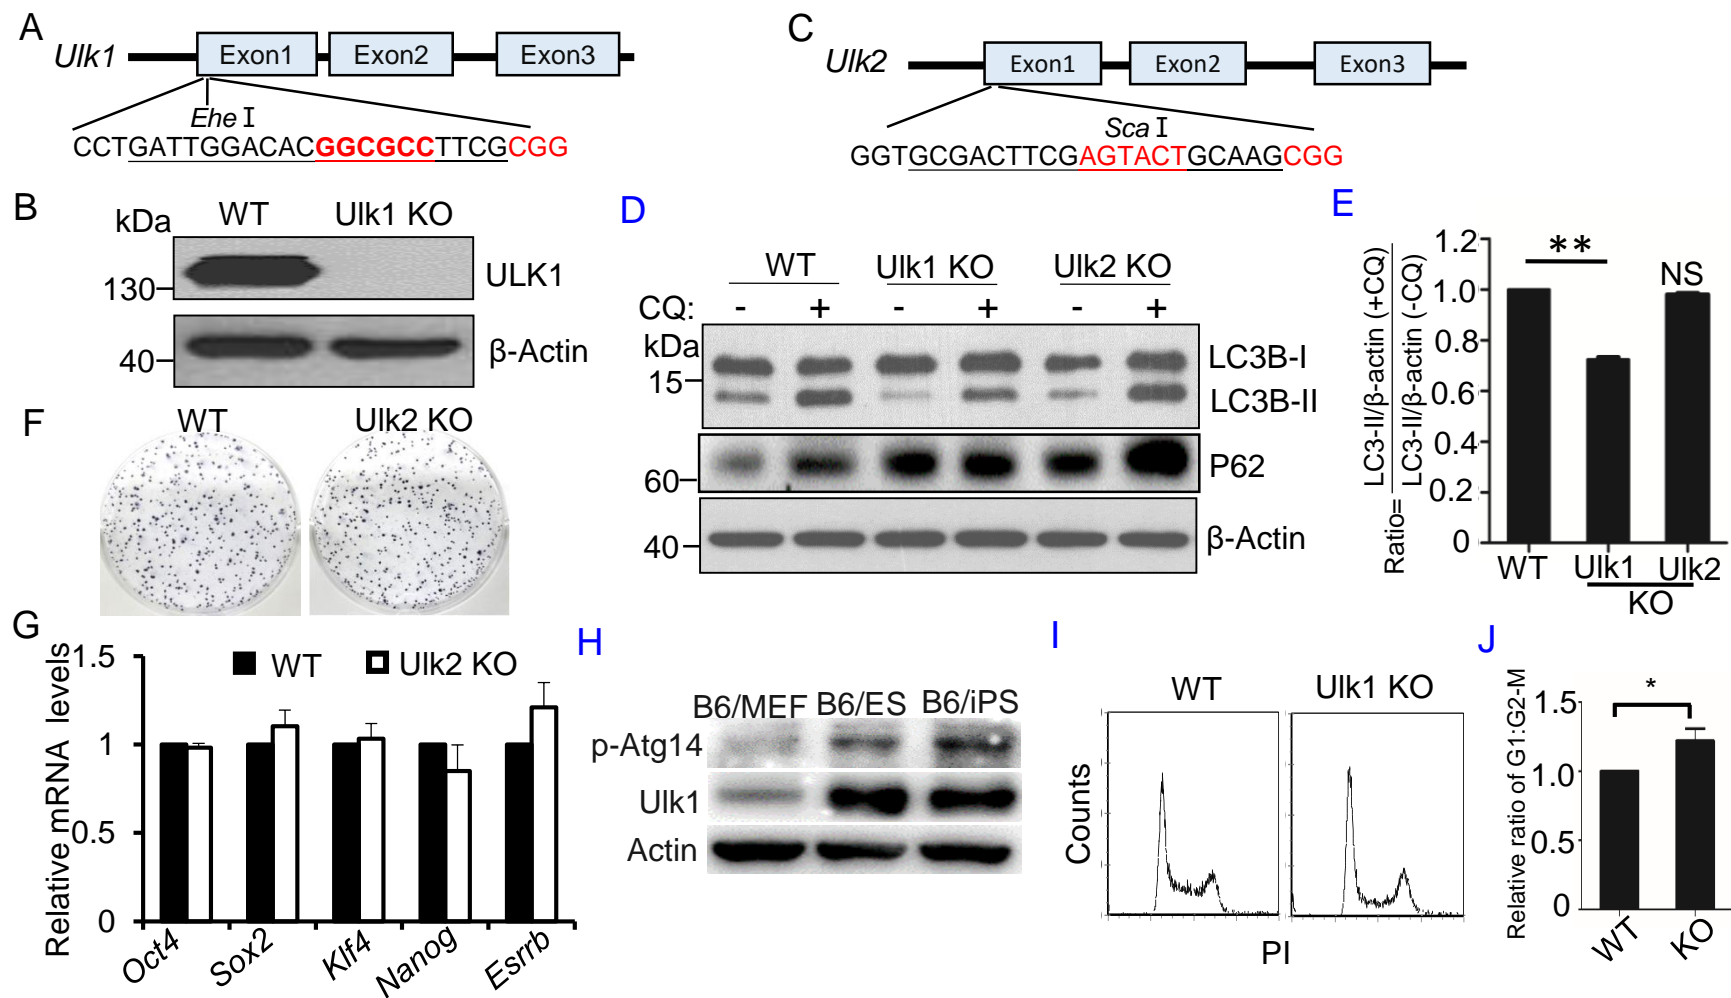

**Supplement Figure 1.** Ulk2 silence did not affect ESC self-renewal and pluripotency. **(A)** sgRNA designed for targeting the first exon of *Ulk1*. **(B)** Western blot analysis of whole cell extracts from *Ulk1*<sup>+/+</sup> and *Ulk1*<sup>-/-</sup>,  $\beta$ -Actin served as a loading control. **(C)** sgRNA designed for targeting the first exon of *Ulk2*. **(D)** The autophagic flux was impaired in *Ulk1*<sup>-/-</sup> but not in *Ulk2*<sup>-/-</sup>. Western blotting was performed in *Ulk1*<sup>+/+</sup>, *Ulk1*<sup>-/-</sup> and *Ulk2*<sup>-/-</sup> ESC lines using anti-LC3 and anti-P62 antibodies. Samples were treated with or without Chloroquine (100  $\mu$ M) for 4 h.  $\beta$ -Actin served as the loading control. **(E)** Quantification of the LC3 turnover ratio by calculating the ratio of LC3-II with or without CQ treatment in **(D)**. Data normalized to WT ESCs and shown as mean  $\pm$  SD, n=3; \*\*, P<0.01, Student's t-test. **(F)** *Ulk2* deletion did not affect ESC colony formation ability. **(G)** *Ulk2* deletion did not affect expression of pluripotent genes. **(H)** The phosphorylated Atg14 (p-Atg14) is highly expressed in ESCs than in MEFs. Whole cell extracts from MEFs, ESCs and iPSCs were harvested for western blot using anti-p-Atg14, anti-*Ulk1* and anti- $\beta$ -Actin antibodies. **(I)** PI staining of DNA contents of both WT and *Ulk1* KO ESCs. **(J)** *Ulk1* deletion enhanced G1/G2-M ratio.

## Supplementary Figure 2. Ulk1 silence impaired the NSC differentiation from ESC

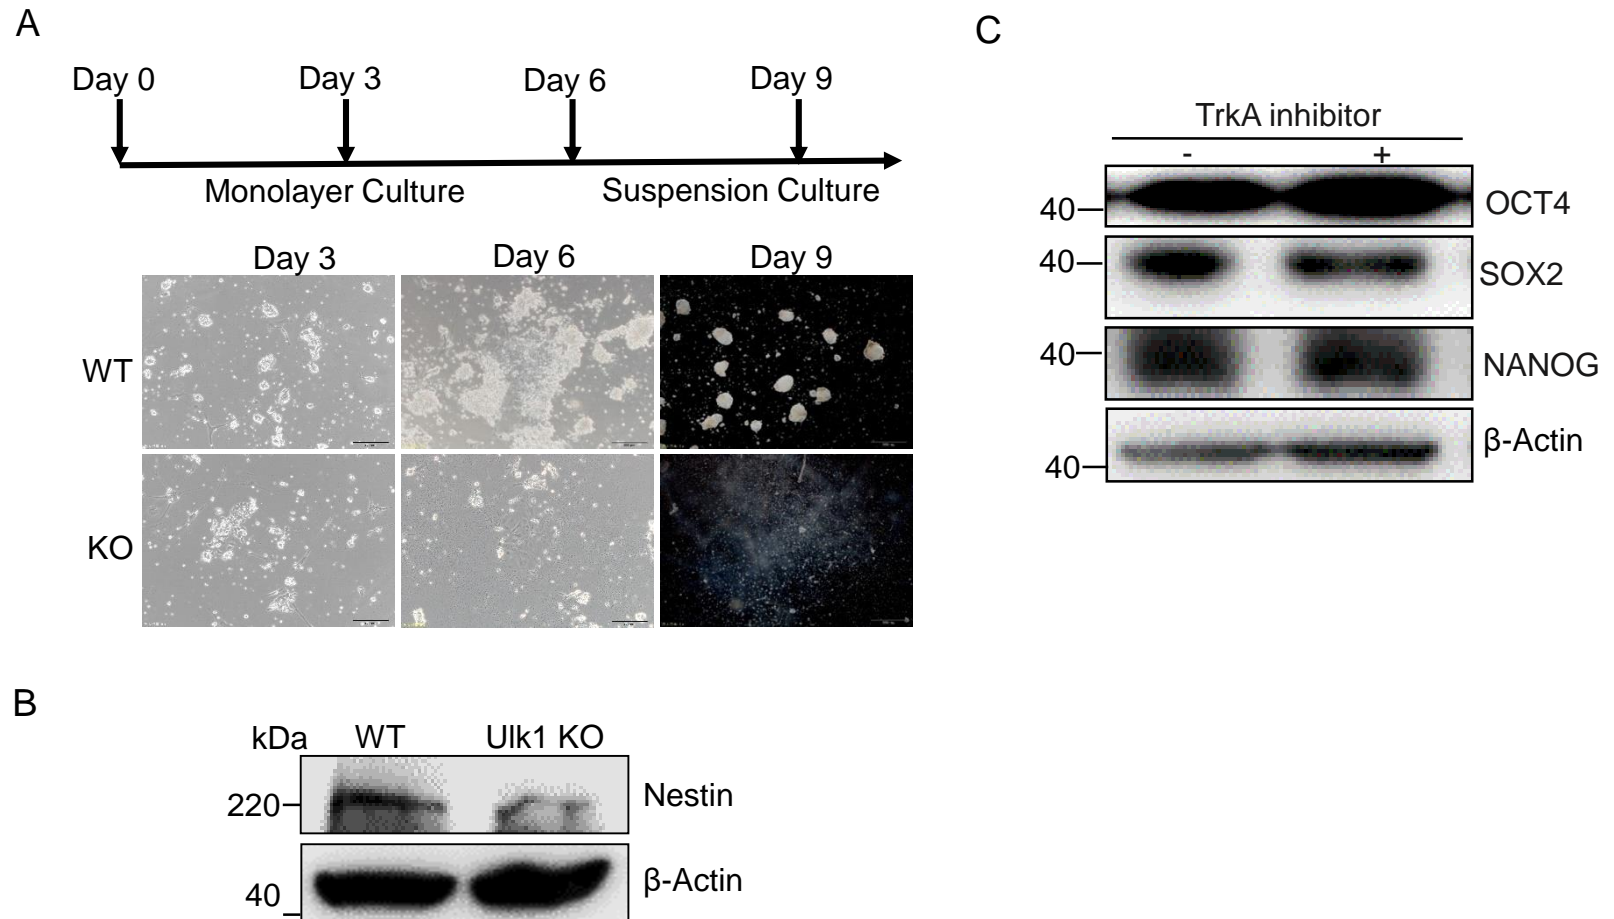

**Supplement Figure 2.** Ulk1 silence impaired the neural stem cell differentiation of mESCs in vitro. **(A)** Differentiation of mESCs into neural stem cell. Images were captured on days 3, 6 and day 9. **(B)** Western blotting for the Nestin between WT and Ulk1 KO ESC-derived NSCs. **(C)** The pluripotent gene expression was not affected upon TrkA inhibitor treatment (2  $\mu$ M, GW441756, Selleck) for 12h. Western blotting was performed in WT and Ulk1<sup>-/-</sup> ES lines using anti-OCT4, anti-SOX2 and anti-NANOG antibodies.
